# Supplementary material for: Highly bright carbon quantum dots for flexible anti-counterfeiting
Source: Royal Society of Chemistry journal article supplement (doi:10.1039/d2tc02664c), 2022-01-01
Supplement: d2tc02664c1.pdf [file d2tc02664c1.pdf]

## Supporting Information

### Highly Bright Carbon Quantum Dots for Flexible Anti-counterfeiting

Shihuan Ren, Bingxu Liu, Maorong Wang, Guangting Han\*, Haiguang Zhao\*, Yuanming Zhang\*

S.H. Ren, B.X. Liu

College of Textiles & Clothing, Qingdao University, No. 308 Ningxia Road, Qingdao 266071, P. R.  
China

Dr. M. R. Wang, Dr. G. T. Han, Dr. H. G. Zhao, Dr. Y. M. Zhang

State Key Laboratory of Bio-Fibers and Eco-Textiles, College of Physics, University-Industry Joint  
Center for Ocean Observation and Broadband Communication, Qingdao University, No. 308  
Ningxia Road, Qingdao 266071, P. R. China

E-mail: (kychgt@qdu.edu.cn; hgzhao@qdu.edu.cn; Zhangyuanming001@163.com)

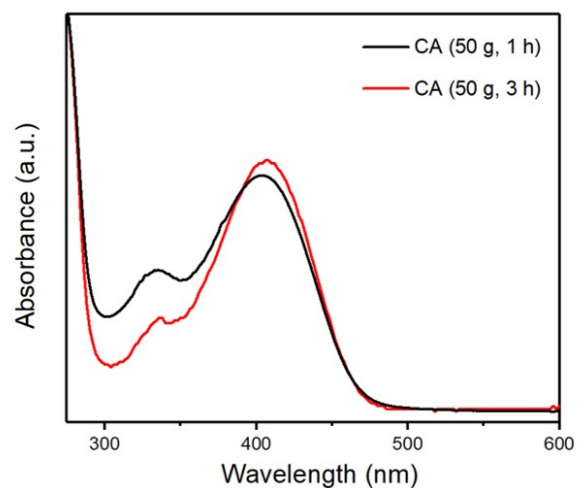

**Figure S1** Absorption spectra of purified C-dots with reaction time of different time.

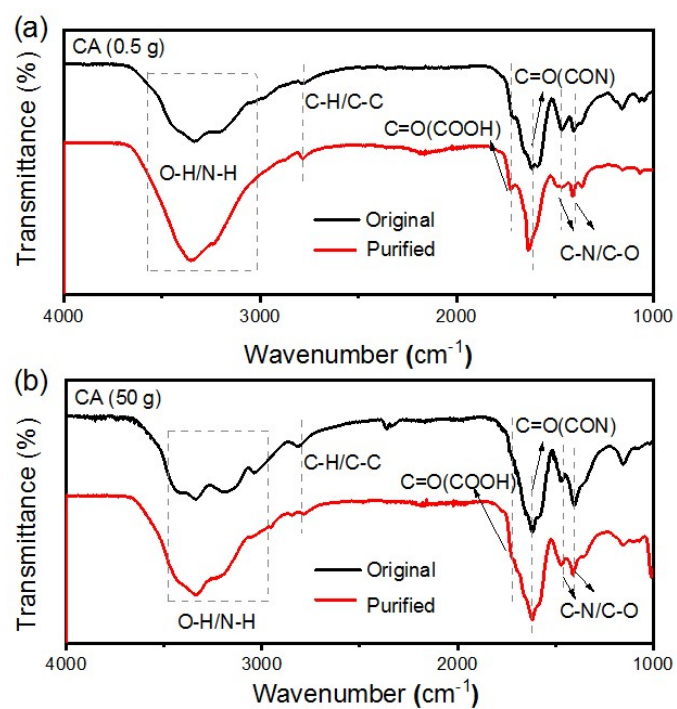

**Figure S2** The FT-IR spectra of the fresh prepared (Original) C-dots and purified C-dots produced using CA of 0.5 g (a) and 50 g (b).

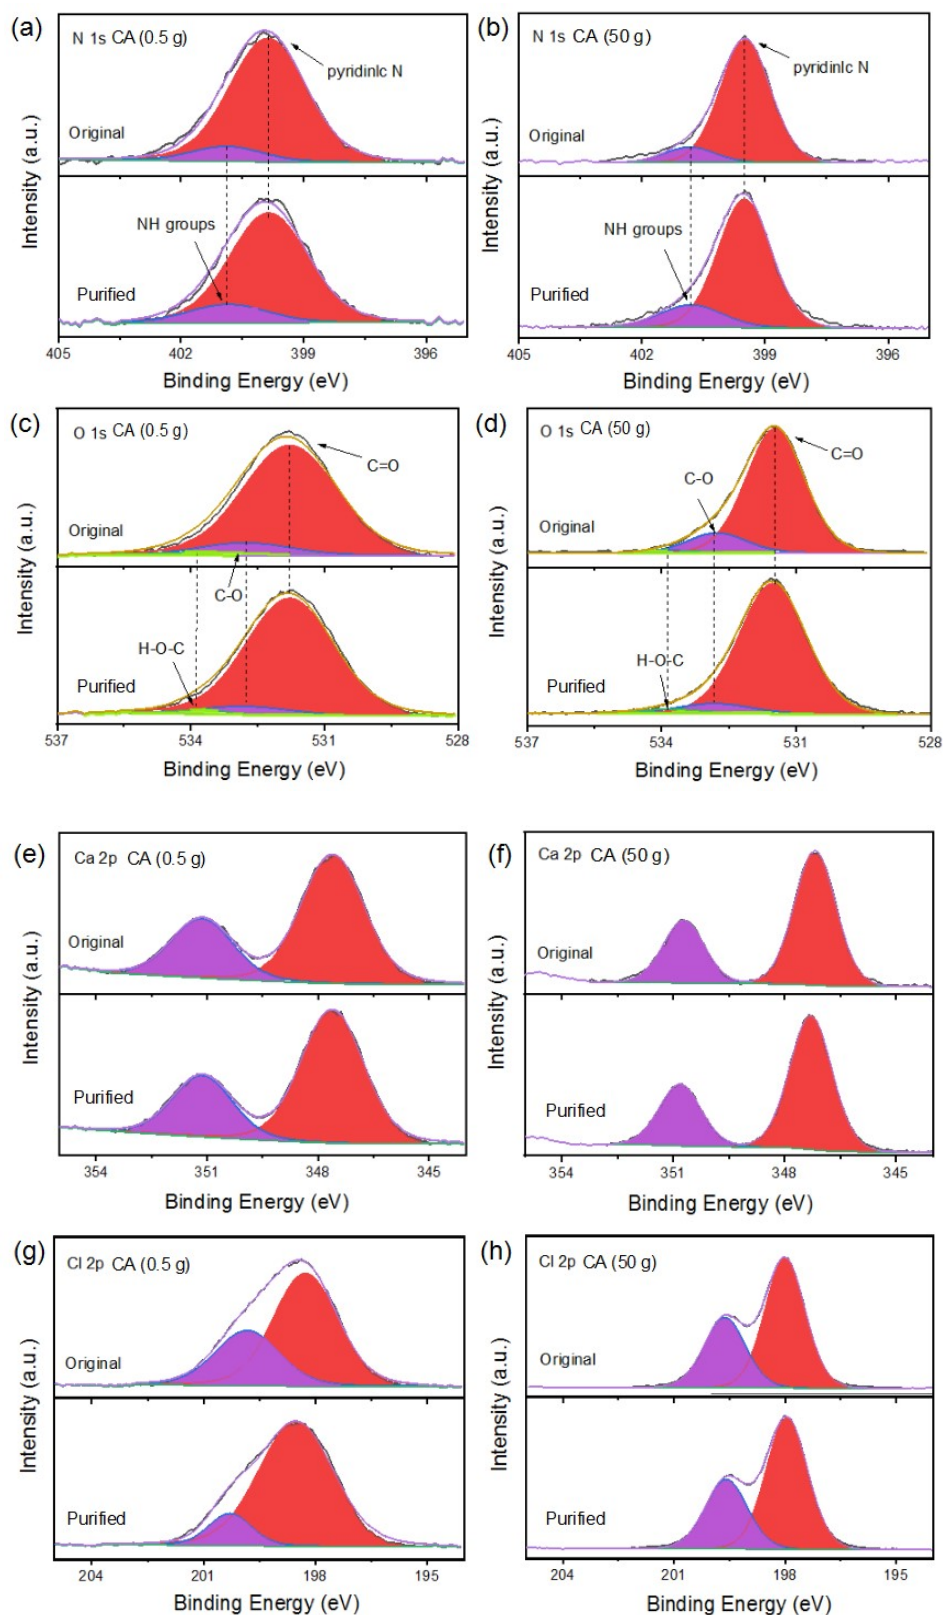

**Figure S3** The high resolution XPS of N 1s (a, b), O 1s (c, d), Ca 2p (e, f), Cl 2p (g, h) spectra of the fresh prepared (Original) C-dots and purified C-dots produced using CA of 0.5 g (left) and 50 g (right).

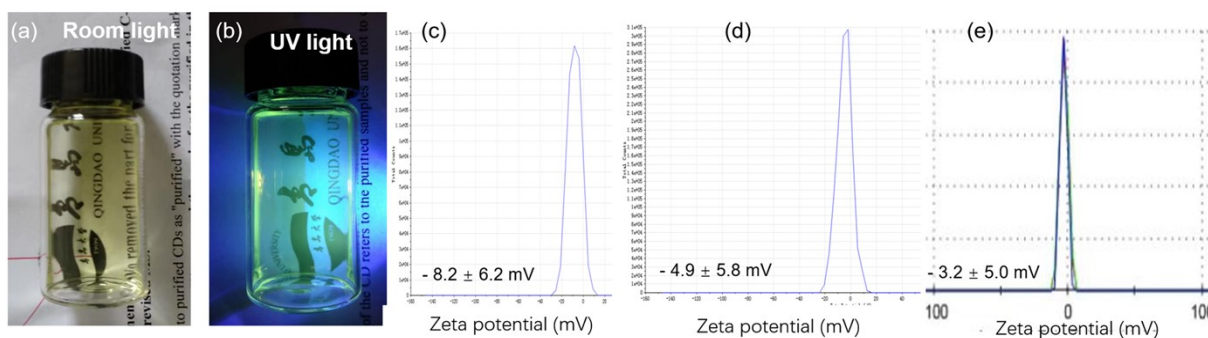

**Figure S4** (a) The purified C-dots with concentration of 0.0035 mg/mL upon room light (a) and UV light (b). Zeta potential plot obtained in water suspension of the purified C-dots with concentration of (c) 0.0035 mg/mL, (d) 0.035 mg/mL and (e) 0.35 mg/mL. Three measures were carried out to obtain the average value.

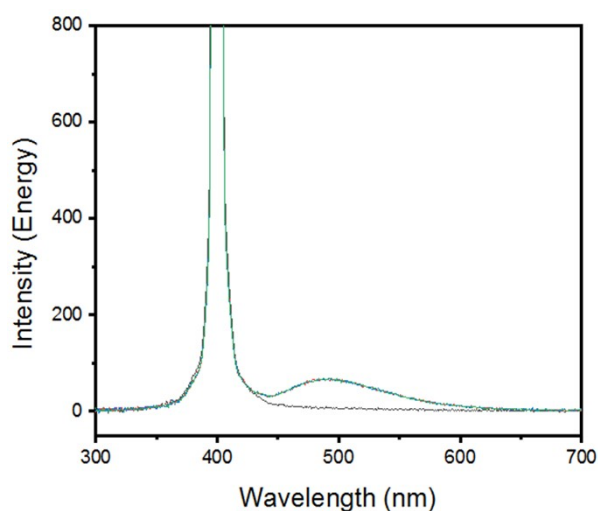

**Figure S5** The measured QYs of the pattern after printing the C-dots/polymer ink on cotton fabric (green line) and the reference (gray line).

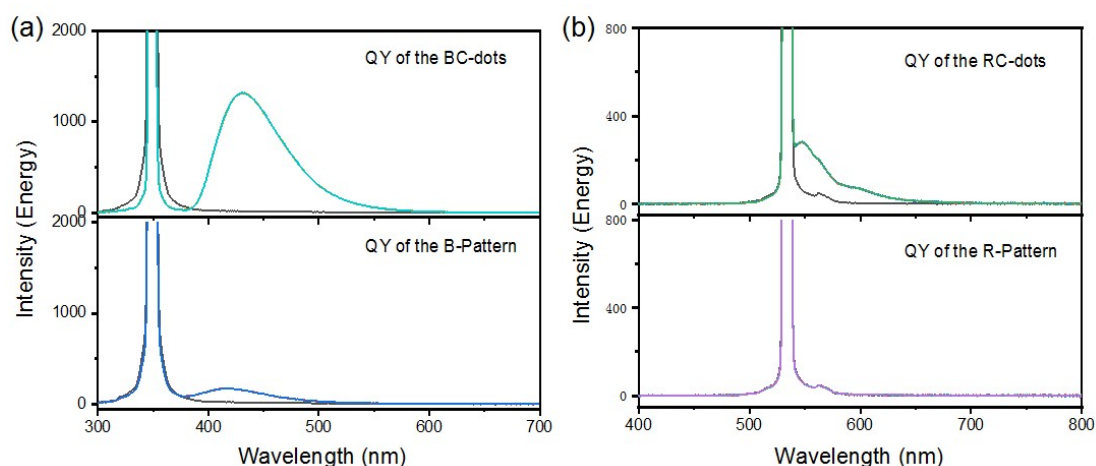

**Figure S6** The measured QYs of blue (a) and red (b) C-dots before and after printing on cotton fabric. The gray lines in the figure (a-c) are the references for the QY measurement.

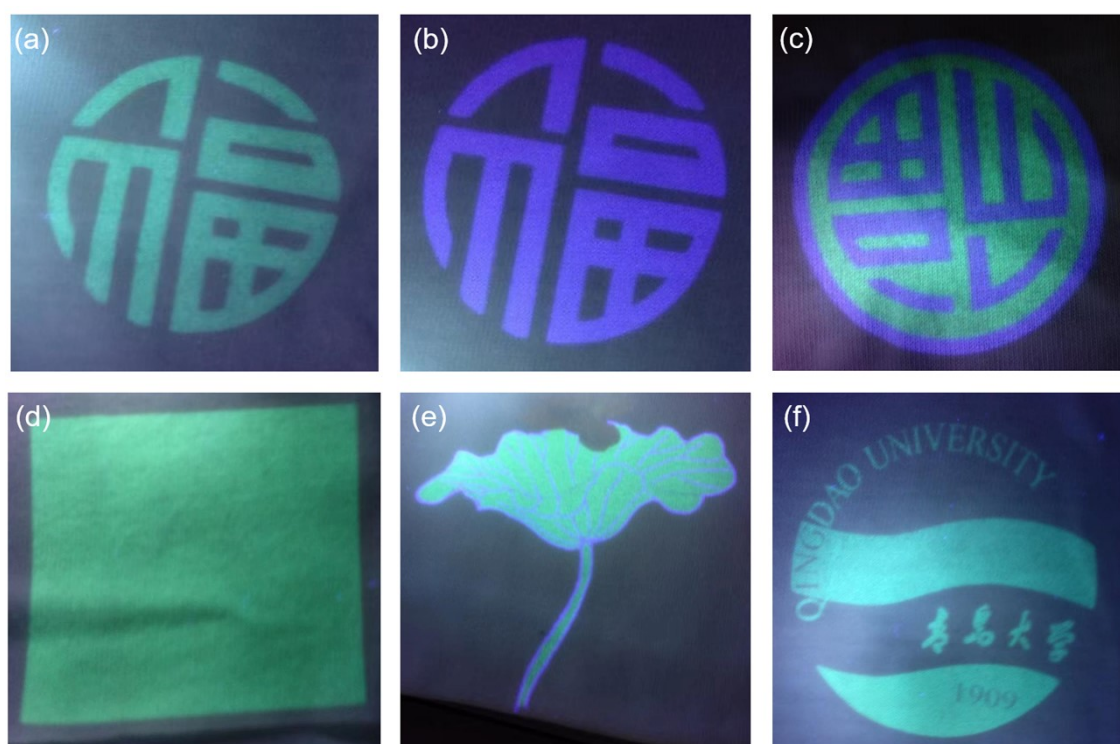

**Figure S7** The printed anti-counterfeit patterns on cotton fabric upon 365 nm illumination: Chinese character indicating “Blessing” using (a) green C-dots, (b) blue C-dots, (c) green and blue C-dots, full printed image using green C-dots (d), lotus leaf using green and blue C-dots (e), and the logo of Qingdao University using green C-dots. For all images, the size is 4 × 4 cm<sup>2</sup>.

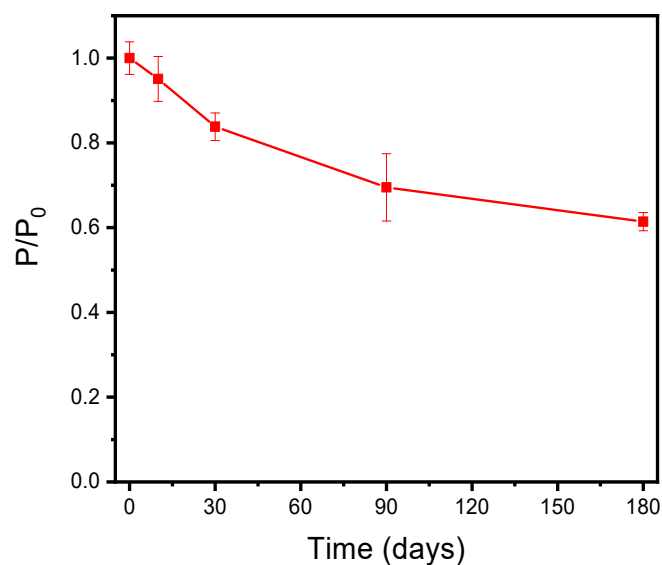

**Figure S8** The PL intensity ratio ( $P/P_0$ ) of the anti-counterfeit code as a function of storage time.

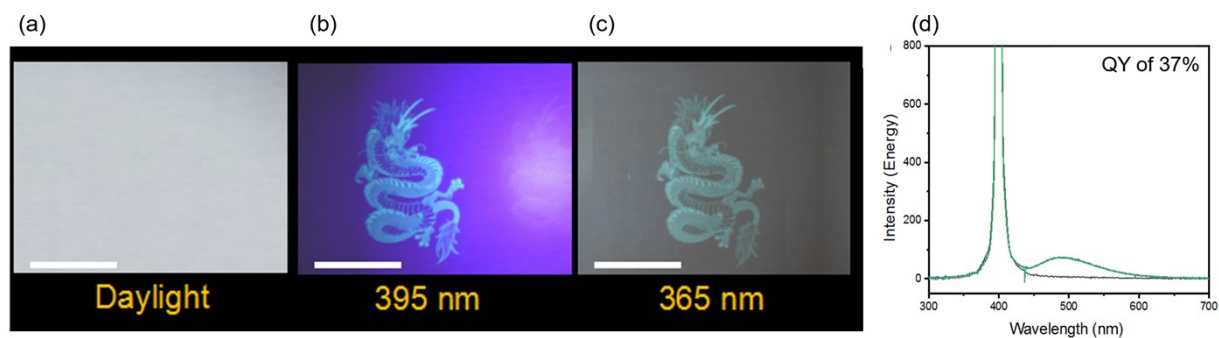

**Figure S9** The designed and printed anti-counterfeit patterns on cotton fabric upon room light and illumination of 395 and 365 nm. The unpurified C-dots were used with the concentration of 0.0035 mg/mL. (d) The measured QYs of the pattern after printing the unpurified C-dots/polymer ink on cotton fabric (green line) and the reference (gray line).
